# Supplementary material for: In SilicoPhylogenetic and Structural Analyses of Plant Endogenous Danger Signaling Molecules upon Stress
Source: Hindawi journal article supplement (doi:10.1155/2019/8683054), 2019-07-15
Supplement: f1 [file 8683054.f1.pdf]

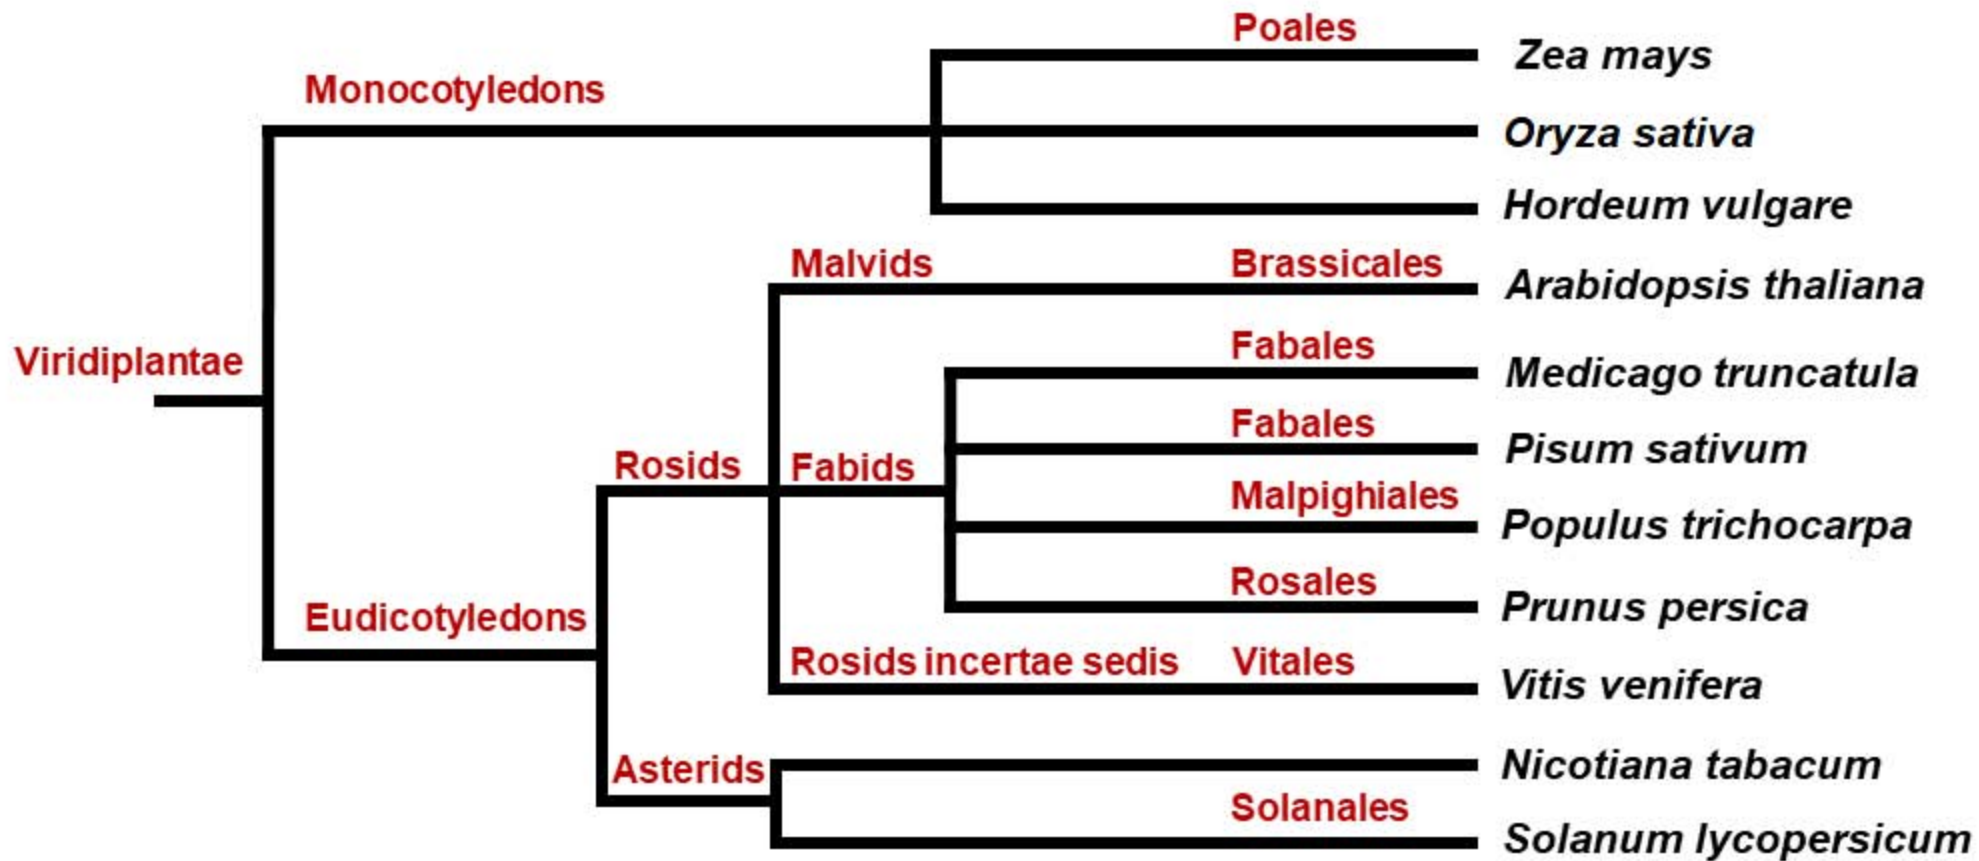

| <b>Organism</b>             | <b>Sequence</b>       | <b>Accession code</b>     |
|-----------------------------|-----------------------|---------------------------|
| <i>Arabidopsis thaliana</i> | ThaleCress BAM3       | O65440 <sup>1</sup>       |
| <i>Arabidopsis thaliana</i> | ThaleCress DORN1      | Q9LSR8 <sup>1</sup>       |
| <i>Arabidopsis thaliana</i> | ThaleCress HMGB1      | O49595 <sup>1</sup>       |
| <i>Arabidopsis thaliana</i> | ThaleCress HMGB2      | O49596 <sup>1</sup>       |
| <i>Arabidopsis thaliana</i> | ThaleCress HMGB3      | P93047 <sup>1</sup>       |
| <i>Arabidopsis thaliana</i> | ThaleCress LYK5       | OAP11490 <sup>2</sup>     |
| <i>Arabidopsis thaliana</i> | ThaleCress MAPK2      | Q9S7U9 <sup>1</sup>       |
| <i>Arabidopsis thaliana</i> | ThaleCress MAPK3      | Q39023 <sup>1</sup>       |
| <i>Arabidopsis thaliana</i> | ThaleCress MAPK6      | Q39026 <sup>1</sup>       |
| <i>Arabidopsis thaliana</i> | ThaleCress MAPK9      | NP_974331 <sup>2</sup>    |
| <i>Arabidopsis thaliana</i> | ThaleCress PEP1       | Q9LV87 <sup>1</sup>       |
| <i>Arabidopsis thaliana</i> | ThaleCress PEPR1      | Q9SSL9 <sup>1</sup>       |
| <i>Arabidopsis thaliana</i> | ThaleCress PEPR2      | Q9FZ59 <sup>1</sup>       |
| <i>Arabidopsis thaliana</i> | ThaleCress SERK3      | Q94F62 <sup>1</sup>       |
| <i>Arabidopsis thaliana</i> | ThaleCress SERK4      | Q9SKG5 <sup>1</sup>       |
| <i>Arabidopsis thaliana</i> | ThaleCress SR160      | NP_195650 <sup>2</sup>    |
| <i>Arabidopsis thaliana</i> | ThaleCress WAK1       | Q39191 <sup>1</sup>       |
| <i>Arabidopsis thaliana</i> | ThaleCress WAK2       | Q9LMP1 <sup>1</sup>       |
| <i>Arabidopsis thaliana</i> | ThaleCress WAK3       | Q9LMN8 <sup>1</sup>       |
| <i>Arabidopsis thaliana</i> | ThaleCress WAK4       | Q9LMN6 <sup>1</sup>       |
| <i>Arabidopsis thaliana</i> | ThaleCress WAK5       | Q9LMN7 <sup>1</sup>       |
| <i>Medicago truncatula</i>  | BarrelMedic DORN1     | XP_013448930 <sup>2</sup> |
| <i>Medicago truncatula</i>  | BarrelMedic HMGB1/2/3 | XP_013462296 <sup>2</sup> |
| <i>Medicago truncatula</i>  | BarrelMedic MAPK3     | XP_003606509 <sup>2</sup> |
| <i>Medicago truncatula</i>  | BarrelMedic MAPK6     | G7JNP9 <sup>1</sup>       |
| <i>Medicago truncatula</i>  | BarrelMedic PEPR1/2   | XP_013465647 <sup>2</sup> |
| <i>Medicago truncatula</i>  | BarrelMedic SERKL     | XP_003593155 <sup>2</sup> |
| <i>Medicago truncatula</i>  | BarrelMedic SR160     | XP_003602504 <sup>2</sup> |
| <i>Medicago truncatula</i>  | BarrelMedic WAKL      | XP_013461333 <sup>2</sup> |
| <i>Pisum sativum</i>        | Pea DORN1             | ABU75307 <sup>2</sup>     |
| <i>Pisum sativum</i>        | Pea HMGB1/2/3         | Q41026 <sup>1</sup>       |
| <i>Pisum sativum</i>        | Pea MAPK3             | Q9M6S1 <sup>1</sup>       |
| <i>Pisum sativum</i>        | Pea MAPK6             | Q06060 <sup>1</sup>       |
| <i>Pisum sativum</i>        | Pea NORK              | Q8LKZ1 <sup>1</sup>       |
| <i>Pisum sativum</i>        | Pea SR160             | Q76FZ8 <sup>1</sup>       |
| <i>Prunus persica</i>       | Peach DORN1           | XP_020422899 <sup>2</sup> |
| <i>Prunus persica</i>       | Peach HMGB1/2/3       | XP_007202727 <sup>2</sup> |
| <i>Prunus persica</i>       | Peach MAPK3           | XP_007205387 <sup>2</sup> |
| <i>Prunus persica</i>       | Peach MAPK6           | M5VPZ6 <sup>1</sup>       |
| <i>Prunus persica</i>       | Peach PEPR1/2         | XP_007217286 <sup>2</sup> |
| <i>Prunus persica</i>       | Peach SERKL           | XP_007201734 <sup>2</sup> |
| <i>Prunus persica</i>       | Peach SR160           | XP_007208382 <sup>2</sup> |
| <i>Prunus persica</i>       | Peach WAKL            | ONI11223 <sup>2</sup>     |
| <i>Populus trichocarpa</i>  | Cottonwood DORN1      | XP_006379022 <sup>2</sup> |

|                             |                      |                           |
|-----------------------------|----------------------|---------------------------|
| <i>Populus trichocarpa</i>  | Cottonwood HMGB1/2/3 | XP_002306980 <sup>2</sup> |
| <i>Populus trichocarpa</i>  | Cottonwood MAPK3     | XP_002314017 <sup>2</sup> |
| <i>Populus trichocarpa</i>  | Cottonwood MAPK6     | B9HGK0 <sup>1</sup>       |
| <i>Populus trichocarpa</i>  | Cottonwood PEPR1/2   | XP_002311912 <sup>2</sup> |
| <i>Populus trichocarpa</i>  | Cottonwood SERKL     | XP_006369340 <sup>2</sup> |
| <i>Populus trichocarpa</i>  | Cottonwood SR160     | XP_002310619 <sup>2</sup> |
| <i>Populus trichocarpa</i>  | Cottonwood WAKL      | XP_006386339 <sup>2</sup> |
| <i>Vitis vinifera</i>       | WineGrape DORN1      | XP_002280641 <sup>2</sup> |
| <i>Vitis vinifera</i>       | WineGrape HMGB1/2/3  | XP_002280084 <sup>2</sup> |
| <i>Vitis vinifera</i>       | WineGrape MAPK3      | XP_002284807 <sup>2</sup> |
| <i>Vitis vinifera</i>       | WineGrape MAPK6      | F6HAX6 <sup>1</sup>       |
| <i>Vitis vinifera</i>       | WineGrape PEPR1/2    | XP_002273607 <sup>2</sup> |
| <i>Vitis vinifera</i>       | WineGrape SERKL      | D7STF6 <sup>1</sup>       |
| <i>Vitis vinifera</i>       | WineGrape SR160      | XP_002278935 <sup>2</sup> |
| <i>Vitis vinifera</i>       | WineGrape WAKL       | XP_002284700 <sup>2</sup> |
| <i>Nicotiana tabacum</i>    | Tobacco DORN1        | XP_016479299 <sup>2</sup> |
| <i>Nicotiana tabacum</i>    | Tobacco HMGB1/2/3    | XP_016457342 <sup>2</sup> |
| <i>Nicotiana tabacum</i>    | Tobacco HSYA         | Q93WP8 <sup>1</sup>       |
| <i>Nicotiana tabacum</i>    | Tobacco HSYB         | Q93WP7 <sup>1</sup>       |
| <i>Nicotiana tabacum</i>    | Tobacco MAPK3        | XP_016478177 <sup>2</sup> |
| <i>Nicotiana tabacum</i>    | Tobacco MAPK6        | O04362 <sup>1</sup>       |
| <i>Nicotiana tabacum</i>    | Tobacco PEPR1/2      | XP_016436237 <sup>2</sup> |
| <i>Nicotiana tabacum</i>    | Tobacco SERKL        | XP_016442040 <sup>2</sup> |
| <i>Nicotiana tabacum</i>    | Tobacco SR160        | NP_001312072 <sup>2</sup> |
| <i>Nicotiana tabacum</i>    | Tobacco WAKL         | XP_016500142 <sup>2</sup> |
| <i>Solanum lycopersicum</i> | Tomato SR160         | Q8GUQ5 <sup>1</sup>       |
| <i>Solanum lycopersicum</i> | Tomato DORN1         | XP_004246354 <sup>2</sup> |
| <i>Solanum lycopersicum</i> | Tomato HMGB1/2/3     | XP_004232565 <sup>2</sup> |
| <i>Solanum lycopersicum</i> | Tomato HSY           | Q7XAD0 <sup>1</sup>       |
| <i>Solanum lycopersicum</i> | Tomato MAPK3         | Q84MI4 <sup>1</sup>       |
| <i>Solanum lycopersicum</i> | Tomato MAPK6         | NP_001234355 <sup>2</sup> |
| <i>Solanum lycopersicum</i> | Tomato PEPR1/2       | XP_004235511 <sup>2</sup> |
| <i>Solanum lycopersicum</i> | Tomato SERKL         | NP_001234626 <sup>2</sup> |
| <i>Solanum lycopersicum</i> | Tomato SYST          | P27058 <sup>1</sup>       |
| <i>Solanum lycopersicum</i> | Tomato WAKL          | K4DAS <sup>1</sup>        |
| <i>Zea mays</i>             | Maize DORN1          | NP_001146046 <sup>2</sup> |
| <i>Zea mays</i>             | Maize HMGB1/2/3      | XP_023157525 <sup>2</sup> |
| <i>Zea mays</i>             | Maize MAPK3          | NP_001140308 <sup>2</sup> |
| <i>Zea mays</i>             | Maize MAPK6          | NP_001152745 <sup>2</sup> |
| <i>Zea mays</i>             | Maize WAKL           | XP_008671196 <sup>2</sup> |
| <i>Zea mays</i>             | Maize PEP1           | A0A0N9ZV66 <sup>1</sup>   |
| <i>Zea mays</i>             | Maize PEPR1/2        | NP_001307735 <sup>2</sup> |
| <i>Zea mays</i>             | Maize SERKL          | B4G007 <sup>1</sup>       |
| <i>Zea mays</i>             | Maize SR160          | NP_001309780 <sup>2</sup> |
| <i>Oryza sativa</i>         | Rice DORN1           | XP_015635471 <sup>2</sup> |
| <i>Oryza sativa</i>         | Rice HMGB1/2/3       | XP_015651271 <sup>2</sup> |

|                        |                  |                           |
|------------------------|------------------|---------------------------|
| <i>Oryza sativa</i>    | Rice MAPK3       | ABH01189 <sup>2</sup>     |
| <i>Oryza sativa</i>    | Rice MAPK6       | Q84UI5 <sup>1</sup>       |
| <i>Oryza sativa</i>    | Rice PEPR1/2     | XP_015648066 <sup>2</sup> |
| <i>Oryza sativa</i>    | Rice SERKL       | Q67X31 <sup>1</sup>       |
| <i>Oryza sativa</i>    | Rice SR160       | XP_015621030 <sup>2</sup> |
| <i>Oryza sativa</i>    | Rice WAKL        | AAL34935 <sup>2</sup>     |
| <i>Hordeum vulgare</i> | Barley DORN1     | BAJ93092 <sup>2</sup>     |
| <i>Hordeum vulgare</i> | Barley HMGB1/2/3 | Q43481 <sup>1</sup>       |
| <i>Hordeum vulgare</i> | Barley MAPK3     | M0V3Q0 <sup>1</sup>       |
| <i>Hordeum vulgare</i> | Barley MAPK6     | BAJ90351 <sup>2</sup>     |
| <i>Hordeum vulgare</i> | Barley PEPR1/2   | BAK08322 <sup>2</sup>     |
| <i>Hordeum vulgare</i> | Barley SERKL     | A2TLT1 <sup>1</sup>       |
| <i>Hordeum vulgare</i> | Barley SR160     | Q76CZ6 <sup>1</sup>       |
| <i>Hordeum vulgare</i> | Barley WAKL      | BAJ97464 <sup>2</sup>     |
| <i>Homo sapiens</i>    | Human HMGB1      | P09429 <sup>1</sup>       |
| <i>Homo sapiens</i>    | Human MAPK3      | P27361 <sup>1</sup>       |
| <i>Homo sapiens</i>    | Human MAPK6      | Q16659 <sup>1</sup>       |
| <i>Gallus gallus</i>   | Chicken MAPK3    | NP_989481 <sup>2</sup>    |
| <i>Gallus gallus</i>   | Chicken MAPK6    | Q5F3W3 <sup>1</sup>       |
| <i>Danio rerio</i>     | Zebrafish MAPK3  | Q7ZVK8 <sup>1</sup>       |
| <i>Danio rerio</i>     | Zebrafish MAPK6  | Q0H1F2 <sup>1</sup>       |

<sup>1</sup>UniProtKB (<https://www.uniprot.org/uniprot/>)

<sup>2</sup>NCBI GenBank (<https://www.ncbi.nlm.nih.gov/genbank/>)
